# Supplementary material for: Long-Term Efficacy and Safety of Everolimus-Eluting Stent Implantation in Japanese Patients with Acute Coronary Syndrome: Five-Year Real-World Data from the Tokyo-MD PCI Study
Source: Hindawi journal article supplement (doi:10.1155/2019/3146848), 2019-11-03
Supplement: f1 [file 3146848.f1.pdf]

**The participating centers and investigators**

**Kazuo Kobayashi, Hirokazu Ohigashi, Koji Sugiyama, Kashiwa Municipal Hospital**

**Akihiko Matsumura, Kameda Medical Center**

**Shigeo Shimizu, Masakazu Ohno, National Disaster Medical Center**

**Hidenobu Takei, Sanraku Hospital**

**Tsuyoshi Tokunaga, Eijiro Hattori, JA Toride Medical Center**

**Michio Usui, Tokyo Yamate Medical Center**

**Ryo Goto, Shuuwa Medical Hospital**

**Tsunekazu Kakuta, Tsuchiura Kyodo General Hospital**

**Hiromasa Adachi, Hiroaki Yamaguchi, Yoichi Ohtaki, Tokyo Kyosai Hospital**

**Akihiro Hata, Tatsuya Fujinami, Toshima Hospital**

**Nobuhisa Obuchi, Tokyo Metropolitan Otsuka Hospital**

**Yasuhiro Sato, Yuko Onishi, Hiratsuka Kyosai Hospital**

**Takanobu Miyamoto, Nozato Toshihiro, Musashino Red Cross Hospital**

**Hiroyuki Hikita, Yokosuka Kyosai Hospital**

**Manabu Kurabayashi, Mitsutoshi Asano, Yokohama City Minato Red Cross Hospital**

**Hiroyuki Fujii, Masato Shimizu, Shigeki Kimura Yokohama Minami Kyosai Hospital**

**Atsuyuki Ohno, Kasai Shoikai Hospital**

**Kaoru Sakurai, Yuji Konishi, Shin-Yurigaoka general hospital**
